# Supplementary material for: Effect of Vaccination on Transmission of SARS-CoV-2
Source: PubMed Central journal article supplement (PMC8451182; doi:10.1056/nejmc2106757), 2021-09-08
Supplement: NEJMc2106757_disclosures.pdf [file NEJMc2106757_disclosures.pdf]

**Disclosure Purpose:** 21-06757

### Summary of Interests

I do not have any interests to disclose at this time.

### Additional Questions:

- Are there other relationships or activities that readers could perceive to have influenced, or that give the appearance of potentially influencing, what you wrote in the submitted work?**  
No.
- What is the manuscript title?**  
Effect of Vaccination on Transmission of SARS-CoV-2
- Are you the corresponding author?**  
No.

### Certification

I certify that the information provided in this disclosure is complete and accurate.

**Disclosure Purpose:** 21-06757

Summary of Interests

I do not have any interests to disclose at this time.

Additional Questions:

- 1. **Are there other relationships or activities that readers could perceive to have influenced, or that give the appearance of potentially influencing, what you wrote in the submitted work?**  
No.
- 2. **What is the manuscript title?**  
Effect of Vaccination on Transmission of SARS-CoV-2
- 3. **Are you the corresponding author?**  
No.

Certification

I certify that the information provided in this disclosure is complete and accurate.

Disclosure Purpose: 21-06757

## Summary of Interests

### Company or Organization

| Entity                                                                                                                                                                                                         | Type             | Interest Held By                                                                |
|----------------------------------------------------------------------------------------------------------------------------------------------------------------------------------------------------------------|------------------|---------------------------------------------------------------------------------|
| <a href="#">AstraZeneca</a>                                                                                                                                                                                    | Grant / Contract | Self                                                                            |
| <i>Recipient Name:</i> Helen Colhoun<br><i>Grant / Contract Description:</i> Grant for research work<br><i>Additional Information:</i>                                                                         |                  | <i>Recipient Type:</i> Institution<br><i>Grant / Contract Purpose:</i> Research |
| <a href="#">Eli Lilly and Company</a>                                                                                                                                                                          | Grant / Contract | Self                                                                            |
| <i>Recipient Name:</i> Helen Colhoun<br><i>Grant / Contract Description:</i> Institutional fees for REWIND steering and operations committee and national leader activities.<br><i>Additional Information:</i> |                  | <i>Recipient Type:</i> Individual<br><i>Grant / Contract Purpose:</i> Research  |
| <a href="#">Novartis Pharmaceuticals Corporation</a>                                                                                                                                                           | Other            | Self                                                                            |
| <i>Category:</i> Other<br><i>Additional Information:</i>                                                                                                                                                       |                  | <i>Description:</i> Advisory panel and honorarium.                              |
| <a href="#">Novo Nordisk</a>                                                                                                                                                                                   | Grant / Contract | Self                                                                            |
| <i>Recipient Name:</i> Helen Colhoun<br><i>Grant / Contract Description:</i> Institutional grant for research and also advisory panel.<br><i>Additional Information:</i>                                       |                  | <i>Recipient Type:</i> Institution<br><i>Grant / Contract Purpose:</i> Research |
| <a href="#">Pfizer Inc.</a>                                                                                                                                                                                    | Grant / Contract | Self                                                                            |
| <i>Recipient Name:</i> Helen Colhoun<br><i>Grant / Contract Description:</i> Grant for institutional research<br><i>Additional Information:</i>                                                                |                  | <i>Recipient Type:</i> Institution<br><i>Grant / Contract Purpose:</i> Research |
| <a href="#">Regeneron Pharmaceuticals</a>                                                                                                                                                                      | Grant / Contract | Self                                                                            |
| <i>Recipient Name:</i> Helen Colhoun<br><i>Grant / Contract Description:</i> Also advisory panel, Speakers bureau and honorarium.<br><i>Additional Information:</i>                                            |                  | <i>Recipient Type:</i> Individual<br><i>Grant / Contract Purpose:</i> Research  |
| <a href="#">Roche pharmaceuticals</a>                                                                                                                                                                          | Other Securities | Self                                                                            |
| <i>Security Description:</i> Shareholder<br><i>Additional Information:</i>                                                                                                                                     |                  |                                                                                 |
| <a href="#">Sanofi Aventis</a>                                                                                                                                                                                 | Other            | Self                                                                            |
| <i>Category:</i> Other<br><i>Additional Information:</i>                                                                                                                                                       |                  | <i>Description:</i> Advisory Panel                                              |

## Additional Questions:

- Are there other relationships or activities that readers could perceive to have influenced, or that give the appearance of potentially influencing, what you wrote in the submitted work?  
No.
- What is the manuscript title?  
Effect of Vaccination on Transmission of SARS-CoV-2
- Are you the corresponding author?  
No.

## Certification

I certify that the information provided in this disclosure is complete and accurate.



**Disclosure Purpose:** 21-06757

**Summary of Interests**

I do not have any interests to disclose at this time.

**Additional Questions:**

- 1. **Are there other relationships or activities that readers could perceive to have influenced, or that give the appearance of potentially influencing, what you wrote in the submitted work?**  
No.
- 2. **What is the manuscript title?**  
effect of vaccination on transmission of SARS-CoV-2
- 3. **Are you the corresponding author?**  
No.

**Certification**

I certify that the information provided in this disclosure is complete and accurate.

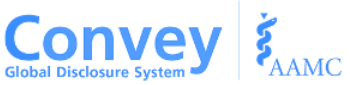

**Disclosure Purpose:** 21-06757

**Summary of Interests**

I do not have any interests to disclose at this time.

**Additional Questions:**

- 1. **Are there other relationships or activities that readers could perceive to have influenced, or that give the appearance of potentially influencing, what you wrote in the submitted work?**  
No.
- 2. **What is the manuscript title?**  
Effect of Vaccination on Transmission of SARS-CoV-2
- 3. **Are you the corresponding author?**  
No.

**Certification**

I certify that the information provided in this disclosure is complete and accurate.

**Disclosure Purpose:** 21-06757

**Summary of Interests**

I do not have any interests to disclose at this time.

**Additional Questions:**

- 1. Are there other relationships or activities that readers could perceive to have influenced, or that give the appearance of potentially influencing, what you wrote in the submitted work?**  
No.
- 2. What is the manuscript title?**  
Effect of Vaccination on Transmission of SARS-CoV-2
- 3. Are you the corresponding author?**  
No.

**Certification**

I certify that the information provided in this disclosure is complete and accurate.



**Disclosure Purpose:** 21-06757

Summary of Interests

I do not have any interests to disclose at this time.

Additional Questions:

- 1. **Are there other relationships or activities that readers could perceive to have influenced, or that give the appearance of potentially influencing, what you wrote in the submitted work?**  
No.
- 2. **What is the manuscript title?**  
Effect of Vaccination on Transmission of SARS-CoV-2
- 3. **Are you the corresponding author?**  
No.

Certification

I certify that the information provided in this disclosure is complete and accurate.





**Disclosure Purpose:** 21-06757

Summary of Interests

I do not have any interests to disclose at this time.

Additional Questions:

1. **Are there other relationships or activities that readers could perceive to have influenced, or that give the appearance of potentially influencing, what you wrote in the submitted work?**

No.

2. **What is the manuscript title?**

Effect of Vaccination on Transmission of SARS-CoV-2," has been accepted for publication in edited form in a forthcoming issue of the Journal

3. **Are you the corresponding author?**

Yes.

a. **Please list the other authors' names here.**

Anoop S V Shah, Ciara Gribben, Jennifer Bishop, Peter Hanlon, David Caldwell, Rachael Wood, Martin Reid, Jim McMenamin, David Goldberg, Diane Stockton, Sharon Hutchinson, Chris Robertson, Paul M McKeigue, Helen M Colhoun, David A McAllister

Certification

I certify that the information provided in this disclosure is complete and accurate.

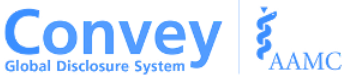

**Disclosure Purpose:** 21-06757

Summary of Interests

I do not have any interests to disclose at this time.

Additional Questions:

- 1. **Are there other relationships or activities that readers could perceive to have influenced, or that give the appearance of potentially influencing, what you wrote in the submitted work?**  
No.
- 2. **What is the manuscript title?**  
Effect of Vaccination on Transmission of SARS-CoV-2
- 3. **Are you the corresponding author?**  
No.

Certification

I certify that the information provided in this disclosure is complete and accurate.

**Disclosure Purpose:** 21-06757

## Summary of Interests

| Entity                                                                                                                                                                          | Type             | Interest Held By                                                                |
|---------------------------------------------------------------------------------------------------------------------------------------------------------------------------------|------------------|---------------------------------------------------------------------------------|
| <a href="#">European Centre for Disease Prevention and Control</a>                                                                                                              | Grant / Contract | Self                                                                            |
| <i>Recipient Name:</i> Health Protection Scotland<br><i>Grant / Contract Description:</i> Epidemiology of influenza and vaccine effectiveness<br><i>Additional Information:</i> |                  | <i>Recipient Type:</i> Institution<br><i>Grant / Contract Purpose:</i> Research |
| <a href="#">World Health Organization</a>                                                                                                                                       | Grant / Contract | Self                                                                            |
| <i>Recipient Name:</i> Public Health Scotland<br><i>Grant / Contract Description:</i> Epidemiology of COVID-19 and vaccine effectiveness<br><i>Additional Information:</i>      |                  | <i>Recipient Type:</i> Institution<br><i>Grant / Contract Purpose:</i> Research |

## Additional Questions:

- Are there other relationships or activities that readers could perceive to have influenced, or that give the appearance of potentially influencing, what you wrote in the submitted work?**  
No.
- What is the manuscript title?**  
Effect of Vaccination on Transmission of SARS-CoV-2
- Are you the corresponding author?**  
No.

## Certification

I certify that the information provided in this disclosure is complete and accurate.

**Disclosure Purpose:** 21-06757

**Summary of Interests**

I do not have any interests to disclose at this time.

**Additional Questions:**

- 1. **Are there other relationships or activities that readers could perceive to have influenced, or that give the appearance of potentially influencing, what you wrote in the submitted work?**  
No.
- 2. **What is the manuscript title?**  
Effect of Vaccination on Transmission of SARS-CoV-2
- 3. **Are you the corresponding author?**  
No.

**Certification**

I certify that the information provided in this disclosure is complete and accurate.

Disclosure Purpose: 21-06757

Summary of Interests

| Company or Organization                                                                                                                       |                  |                                                                                 |
|-----------------------------------------------------------------------------------------------------------------------------------------------|------------------|---------------------------------------------------------------------------------|
| Entity                                                                                                                                        | Type             | Interest Held By                                                                |
| Chief Medical Officer, Scotland                                                                                                               | Other            | Self                                                                            |
| <i>Category: Other</i><br><i>Additional Information: no remuneration</i>                                                                      |                  | <i>Description: Scientific Advice</i>                                           |
| MHRA                                                                                                                                          | Other            | Self                                                                            |
| <i>Category: Other</i><br><i>Additional Information: no remuneration</i>                                                                      |                  | <i>Description: Expert Working Group</i>                                        |
| Public Health Scotland                                                                                                                        | Grant / Contract | Self                                                                            |
| <i>Recipient Name: Strathclyde University</i><br><i>Grant / Contract Description: Statistical Modelling</i><br><i>Additional Information:</i> |                  | <i>Recipient Type: Institution</i><br><i>Grant / Contract Purpose: Research</i> |
| SPI-M                                                                                                                                         | Other            | Self                                                                            |
| <i>Category: Other</i><br><i>Additional Information: no remuneration</i>                                                                      |                  | <i>Description: Scientific Advice</i>                                           |

Additional Questions:

- Are there other relationships or activities that readers could perceive to have influenced, or that give the appearance of potentially influencing, what you wrote in the submitted work?  
No.
- What is the manuscript title?  
Effect of Vaccination on Transmission of SARS-CoV-2
- Are you the corresponding author?  
No.

Certification

I certify that the information provided in this disclosure is complete and accurate.

**Disclosure Purpose:** 21-06757

### Summary of Interests

I do not have any interests to disclose at this time.

### Additional Questions:

- Are there other relationships or activities that readers could perceive to have influenced, or that give the appearance of potentially influencing, what you wrote in the submitted work?**  
No.
- What is the manuscript title?**  
Effect of Vaccination on Transmission of SARS-CoV-2
- Are you the corresponding author?**  
No.

### Certification

I certify that the information provided in this disclosure is complete and accurate.

**Disclosure Purpose:** 21-06757

**Summary of Interests**

I do not have any interests to disclose at this time.

**Additional Questions:**

- 1. **Are there other relationships or activities that readers could perceive to have influenced, or that give the appearance of potentially influencing, what you wrote in the submitted work?**  
No.
- 2. **What is the manuscript title?**  
Effect of Vaccination on Transmission of SARS-CoV-2
- 3. **Are you the corresponding author?**  
No.

**Certification**

I certify that the information provided in this disclosure is complete and accurate.

**Disclosure Purpose:** 21-06757

**Summary of Interests**

I do not have any interests to disclose at this time.

**Additional Questions:**

- 1. **Are there other relationships or activities that readers could perceive to have influenced, or that give the appearance of potentially influencing, what you wrote in the submitted work?**  
No.
- 2. **What is the manuscript title?**  
Effect of Vaccination on Transmission of SARS-CoV-2
- 3. **Are you the corresponding author?**  
No.

**Certification**

I certify that the information provided in this disclosure is complete and accurate.
